# Supplementary material
Source: MDPI journal article supplement (https://www.mdpi.com/2079-6412/11/11/1304)
Supplement: s1 [file s1]

# Supplementary Materials: Methods and Products for the Conservation of Vandalized Urban Art Murals

Andrea Macchia <sup>1</sup>, Margarida Castro <sup>2</sup>, Claudia Curbelo <sup>1</sup>, Laura Rivaroli <sup>1</sup>, Sara Capriotti <sup>1</sup>, Eduarda Vieira <sup>2</sup>, Patrícia Moreira <sup>2</sup>, Silvestro Antonio Ruffolo <sup>3</sup> and Mauro Francesco La Russa <sup>3,\*</sup>

<sup>1</sup> Youth in Conservation of Cultural Heritage (YOCOCU), 00185 Rome, Italy; info@yococu.com (A.M.); info@yococu.it (C.C.); laura\_rivaroli@yahoo.it (L.R.); saracapriotti@yahoo.it (S.C.)

<sup>2</sup> Escola das Artes, Universidade Católica Portuguesa (UCP), 4169-005 Porto, Portugal; yococu.yococu@gmail.com (M.C.); evieira@porto.ucp.pt (E.V.); prmoreira@porto.ucp.pt (P.M.)

<sup>3</sup> DiBEST—Dipartimento di Biologia, Ecologia e Scienze della Terra, University of Calabria, 87036 Rende, Italy; silvestro.ruffolo@unical.it

\* Correspondence: mauro.larussa@unical.it

**Table S1.** Solubility tests on vandalized specimens with Montana 94.

| 1                                                                                          | 2    | 3    | 4    | 5    | 6    | 7    | 8    |
|--------------------------------------------------------------------------------------------|------|------|------|------|------|------|------|
| <b>Swab rolling test (beginning of removal) — (number of strokes — max 100–):</b>          |      |      |      |      |      |      |      |
| 65                                                                                         | 85   | 100  | 2    | 2    | 20   | 2    | 100  |
| <b>Solvent action (min. +; max. +++)   Amount required to remove vandalism paint:</b>      |      |      |      |      |      |      |      |
| +                                                                                          | +    | +    | +++  | ++   | ++   | ++   | ++   |
| 5 mL                                                                                       | 2 mL | 5 mL | 3 mL | 2 mL | 4 mL | 3 mL | 2 mL |
| <b>Aggressiveness (min. +; max. +++):</b>                                                  |      |      |      |      |      |      |      |
| +                                                                                          | +    | +    | +++  | +++  | ++   | ++   | ++   |
| <b>Efficiency evaluated on the solvent power and on its management (min. +; max. +++):</b> |      |      |      |      |      |      |      |
| +                                                                                          | ++   | +    | +++  | ++   | +++  | +++  | ++   |

**Table S2.** Solubility tests on vandalized specimens with IVAS SP.

| 1                                                                                          | 2    | 3                   | 4    | 5    | 6    | 7    | 8    |
|--------------------------------------------------------------------------------------------|------|---------------------|------|------|------|------|------|
| <b>Swab rolling test (beginning of removal) — (number of strokes — max 100–):</b>          |      |                     |      |      |      |      |      |
| 82 (no removal)                                                                            | 92   | 100 without results | 4    | 4    | 22   | 5    | 5    |
| <b>Solvent action (min. +; max. +++)   Amount required to remove vandalism paint:</b>      |      |                     |      |      |      |      |      |
| ++                                                                                         | ++   | +++                 | +++  | +++  | ++   | ++   | ++   |
| 4 mL                                                                                       | 4 mL | 3 mL                | 1 mL | 3 mL | 2 mL | 3 mL | 3 mL |
| <b>Aggressiveness (min. +; max. +++):</b>                                                  |      |                     |      |      |      |      |      |
| +                                                                                          | +    | +                   | +++  | +++  | ++   | +++  | +++  |
| <b>Efficiency evaluated on the solvent power and on its management (min. +; max. +++):</b> |      |                     |      |      |      |      |      |
| ++                                                                                         | +    | ++                  | ++   | +    | +    | +    | +    |

**Table S3.** Solubility tests on vandalized specimens with Loop.

| 1                                                                                          | 2    | 3                   | 4    | 5    | 6    | 7    | 8    |
|--------------------------------------------------------------------------------------------|------|---------------------|------|------|------|------|------|
| <b>Swab rolling test (beginning of removal) – (number of strokes – max 100–):</b>          |      |                     |      |      |      |      |      |
| 100 (no removal)                                                                           | 54   | 100 without results | 2    | 2    | 63   | 3    | 17   |
| <b>Solvent action (min. +; max. +++ )   Amount required to remove vandalism paint:</b>     |      |                     |      |      |      |      |      |
| +                                                                                          | +    | +                   | +++  | ++   | ++   | ++   | ++   |
| 3 mL                                                                                       | 2 mL | 3 mL                | 5 mL | 2 mL | 2 mL | 2 mL | 5 mL |
| <b>Aggressiveness (min. +; max. +++):</b>                                                  |      |                     |      |      |      |      |      |
| +                                                                                          | +    | +                   | +++  | +++  | +    | ++   | +++  |
| <b>Efficiency evaluated on the solvent power and on its management (min. +; max. +++):</b> |      |                     |      |      |      |      |      |
| ++                                                                                         | +++  | +                   | ++   | ++   | +++  | ++   | +    |

**Table S4.** Solubility tests on vandalized specimens with Montana Water Base.

| 1                                                                                          | 2    | 3    | 4    | 5    | 6    | 7    | 8    |
|--------------------------------------------------------------------------------------------|------|------|------|------|------|------|------|
| <b>Swab rolling test (beginning of removal) – (number of strokes – max 100–):</b>          |      |      |      |      |      |      |      |
| 61                                                                                         | 34   | 78   | 2    | 3    | 57   | 2    | 28   |
| <b>Solvent action (min. +; max. +++ )   Amount required to remove vandalism paint:</b>     |      |      |      |      |      |      |      |
| ++                                                                                         | ++   | +    | +++  | +++  | +++  | +++  | ++   |
| 4 mL                                                                                       | 6 mL | 2 mL |
| <b>Aggressiveness (min. +; max. +++):</b>                                                  |      |      |      |      |      |      |      |
| ++                                                                                         | ++   | +    | +++  | +++  | +++  | +++  | +++  |
| <b>Efficiency evaluated on the solvent power and on its management (min. +; max. +++):</b> |      |      |      |      |      |      |      |
| +                                                                                          | +    | +    | ++   | ++   | ++   | +++  | +    |
